# Supplementary material
Source: publisher figshare collection journal article supplement (https://gsapubs.figshare.com/articles/dataset/_/14524266)
Supplement: Supplementary file 1 [file 1]

## Sheet: G48881
Scheingross, J.S., and Lamb, M.P., 2021, Mass balance controls on sediment scour and bedrock erosion in waterfall plunge pools: Geology, v. 49, https://doi.org/10.1130/G48881.1

## Sheet: Table_S1
Table S1. Field-surveyed waterfall plunge pools from Scheingross et al (2016)†															Qs_river/Qsc_river = 1		Qs_river/Qsc_river = 0.5		Qs_river/Qsc_river = 0.1
River	ID	S	W (m)	Hdrop (m)	rpool (m)	hpool (m)	D50 river (m)	D84 river (m)	A (km2)	UTM East	UTM North	Pool floor	USGS Gage ID	Agage (km2)	Return period for bedrock ersoion (yr)	Qw_scour for bedrcok ersoion (m3/s)	Return period for bedrock ersoion (yr)	Qw_scour for bedrcok ersoion (m3/s)	Return period for bedrock ersoion (yr)	Qw_scour for bedrcok ersoion (m3/s)
Colby Canyon	CP1	0.06	5	2.5	2.3	0.9	0.15	0.38	2.62	395326	3792758	sed	11098000	41.4	106*	61**	106*	61.6**	106*	55.053
Colby Canyon	CP2a	0.07	4	2	0.85	0.65	0.15	0.38	1.64	395467	3792855	sed	11098000	41.4	106*	21.1**	106*	21.5**	106*	21.5**
Colby Canyon	CP2b	0.07	4	0.6	1.85	0.4	0.15	0.38	1.64	395467	3792855	sed	11098000	41.4	20.3012	5.8**	19.8496	5.7**	19.8496	5.7**
Colby Canyon	CP3	0.06	3	1.2	1.8	0.5	0.15	0.38	1.64	395463	3792879	sed	11098000	41.4	106*	12.1**	106*	12.0**	106*	12.0**
Colby Canyon	CP4b	0.05	3	3.2	1.5	1	0.15	0.38	1.61	395568	3792957	sed	11098000	41.4	106*	53.1**	106*	51.1003	106*	26.9148
Colby Canyon	CP4c	0.05	3	1.9	2.275	1	0.15	0.38	1.61	395568	3792957	sed	11098000	41.4	106*	24.3**	106*	24.0**	106*	24.0**
Little Santa Anita	LR1	0.08	3.5	8.5	1	0.1	0.1	N/A	5.49	403678	3782944	sed	11100500	4.76	N/A‡	N/A‡	N/A‡	N/A‡	N/A‡	N/A‡
Little Santa Anita	LR2	0.08	5	4	2.875	0.5	0.1	N/A	5.49	403681	3782993	?	11100500	4.76	47*	44.8	47*	27.2535	31.7153	13.0022
Little Santa Anita	LR3	0.08	4	3.5	0.6875	0.3	0.1	N/A	5.54	403700	3782879	br	11100500	4.76	40.2076	15.6**	40.9411	15.9**	N/A‡	N/A‡
Little Santa Anita	LR4	0.08	5	8	2	1.5	0.1	N/A	5.55	403707	3782848	?	11100500	4.76	13.0673	6.6	N/A‡	N/A‡	N/A‡	N/A‡
Little Santa Anita	LR5a	0.08	4	5.5	0.75	1.5	0.1	N/A	5.55	403704	3782825	?	11100500	4.76	N/A‡	15.6	N/A‡	N/A‡	N/A‡	N/A‡
Little Santa Anita	LR5b	0.08	4	1.25	1.25	1.5	0.1	N/A	5.55	403704	3782825	?	11100500	4.76	45.1912	17.2**	45.4576	17.2**	45.4576	17.2**
Little Santa Anita	LD1a	0.08	5	1	0.575	0.24	0.1	N/A	5.59	403707	3782759	br	11100500	4.76	12.8845	6.4**	12.8845	6.4**	12.8845	6.4**
Little Santa Anita	LD1b	0.08	5	4	0.65	0.1	0.1	N/A	5.59	403707	3782759	sed	11100500	4.76	34.0547	13.9**	33.6278	13.8**	N/A‡	N/A‡
Little Santa Anita	LR6	0.08	6	5.2	1.875	2	0.1	N/A	5.6	403719	3782712	?	11100500	4.76	47*	30.2	15.4004	9.64766	N/A‡	N/A‡
Little Santa Anita	LR7a	0.08	6	4.5	0.975	0.3	0.1	N/A	5.6	403675	3782679	sed	11100500	4.76	47*	36.7**	25.5724	11.4165	N/A‡	N/A‡
Little Santa Anita	LR7b	0.08	6	0.75	1.5	1.5	0.1	N/A	5.6	403675	3782679	?	11100500	4.76	27.975	12.1**	27.6039	12.0**	27.6039	12.0**
Little Santa Anita	LDF	0.1	6	1.5	2.125	0.1	0.1	N/A	5.7	403693	3782583	sed	11100500	4.76	47*	34.3**	47*	34.4**	47*	32.5197
Little Santa Anita	LR8	0.11	6	4.5	2	0.1	0.1	N/A	5.72	403699	3782457	sed	11100500	4.76	47*	54.2	47*	21.2736	12.4391	5.91803
Little Santa Anita	LR9	0.11	5	2.7	2	2	0.1	N/A	5.76	403722	3782369	?	11100500	4.76	47*	68.5**	47*	39.8836	34.9087	14.6288
Little Santa Anita	LR10	0.09	3	3	1.5	1	0.1	N/A	5.8	403870	3782433	?	11100500	4.76	47*	37.5	47*	20.9335	13.5815	7.54068
Little Santa Anita	LR11	0.09	2.5	4.7	2.25	4	0.1	N/A	5.82	403910	3782489	?	11100500	4.76	47*	19.8	38.3056	15.8422	14.7006	9.0802
Rubio Canyon	RR1	0.13	4	23	1.8875	0.25	0.1	N/A	2.26	397227	3785825	sed	11098000	41.4	N/A‡	N/A‡	N/A‡	N/A‡	N/A‡	N/A‡
Rubio Canyon	RR2	0.13	3	6.5	1.55	0.2	0.1	N/A	2.26	397226	3785809	sed	11098000	41.4	106*	14.6	14.4629	6.41523	N/A‡	N/A‡
Rubio Canyon	RR3	0.13	4	4.6	1.5	0.1	0.1	N/A	2.27	397223	3787590	sed	11098000	41.4	106*	38.3	106*	15.5139	7.09657	3.54392
Rubio Canyon	RR4	0.15	4	6.2	2.25	0.1	0.1	N/A	2.27	397178	3785777	sed	11098000	41.4	106*	26.3	106*	14.6812	11.4087	5.31147
Rubio Canyon	RR5	0.15	3	7.5	2	0.1	0.1	N/A	2.27	397172	3785769	sed	11098000	41.4	106*	14.6	35.5601	9.0599	6.54731	3.04337
Rubio Canyon	RR6	0.18	4	8.5	1.35	0.1	0.1	N/A	2.28	397152	3785725	sed	11098000	41.4	37.6828	9.6	6.35326	2.90147	N/A‡	N/A‡
Daisy Canyon	DC1	0.1	2	1.5	0.8	0.3	0.11	0.26	0.75	395633	3792897	sed	11098000	41.4	106*	11.3**	106*	11.4**	106*	11.4**
Daisy Canyon	DC2	0.1	3	2.3	1.325	0.65	0.11	0.26	0.75	395615	3792880	sed	11098000	41.4	106*	32.7**	106*	32.6**	106*	14.2805
Daisy Canyon	DC3	0.1	2	1.1	0.95	0.5	0.11	0.26	0.76	395604	3792828	sed	11098000	41.4	106*	7.1**	106*	7.1**	106*	7.1**
Daisy Canyon	DC4	0.1	2	1.5	1	0.1	0.11	0.26	0.8	395581	3792807	sed	11098000	41.4	106*	11.3**	106*	11.4**	106*	11.4**
Daisy Canyon	DC5	0.1	2	4	1	0.1	0.11	0.26	0.85	395508	3792735	sed	11098000	41.4	106*	25.4	106*	12.6577	20.2967	3.00623
Arroyo Seco	USF	0.035	5	12	7.25	0.5	0.021	0.32	12.08	393659	3791349	sed	11098000	41.4	3.60028	9.7	2.97369	7.44195	1.88899	4.66862
Arroyo Seco (Reference site)	MSF	0.035	5	3	4	3	0.021	0.32	12.28	393855	3791207	?	11098000	41.4	1.82852	4.3	1.60751	3.15713	1.48203	2.09079
Arroyo Seco	LSF	0.035	5	5	4.375	2	0.021	0.32	12.28	393855	3791207	?	11098000	41.4	1.67428	3.7	1.53455	2.89081	1.47406	1.96164
Arroyo Seco	ASP1	0.014	4	1.21	3	0.3	0.021	0.32	12.53	394148	3790733	sed	11098000	41.4	1.75695	4	1.53432	2.94509	1.30818	1.5568
Arroyo Seco	ASP2	0.049	3	1.45	3	0.5	0.021	0.32	12.51	394085	3790816	sed	11098000	41.4	2.43969	5.9	1.84238	4.45795	1.50506	2.44621
Arroyo Seco	ASP3	0.052	5	2.18	3	0.3	0.021	0.32	12.49	394042	3790846	sed	11098000	41.4	1.81574	4.3	1.56022	3.00832	1.30466	1.52925
Arroyo Seco	ASP4	0.035	5	2.32	3	3	0.021	0.32	12.49	394048	3790853	?	11098000	41.4	1.56936	3.1	1.48619	2.19505	1.16177	1.21337
Arroyo Seco	ASP5	0.016	4	1.23	3	0.1	0.021	0.32	12.48	394066	3790866	sed	11098000	41.4	1.80777	4.2	1.57607	3.11638	1.34337	1.66865
Fall Creek	FCR1	0.05	3	10.5	1.925	2	0.025	N/A	5.68	392877	3796770	?	11095500	274.5	2.7071	0.6	2.38127	0.459541	N/A‡	N/A‡
Fall Creek	FCR2	0.05	4	12	3.675	0.7	0.025	N/A	5.68	392885	3796758	sed	11095500	274.5	10.6536	2.9	6.65983	2.15543	5.69523	1.30669
Fall Creek	FCR3	0.05	3	7	3.875	0.55	0.025	N/A	5.68	392890	3796746	sed	11095500	274.5	13.6016	4	11.4369	2.95964	6.19022	1.80223
Fall Creek	FCR4	0.05	4	23	3.85	0.5	0.025	N/A	5.68	392895	3796728	sed	11095500	274.5	8.66416	2.8	6.5704	2.08816	5.6579	1.26725
Classic Canyon	CC1	0.12	4	1.5	1.5	0.4	0.05	N/A	1.42	392893	3796323	sed	11095500	274.5	61*	18.7	61*	10.327	38.6567	4.42686
Classic Canyon	CCR1	0.12	3	6.5	2.3	0.8	0.05	N/A	1.49	392684	3796459	sed	11095500	274.5	42.9741	5.2	21.429	3.30208	15.6236	1.46532
Classic Canyon	CCR2	0.12	3	9	2.275	0.5	0.05	N/A	1.49	392675	3796474	sed	11095500	274.5	20.0687	3.2	17.1516	2.05209	14.2933	1.1589
Classic Canyon	CCR2a	0.12	3	2	1.375	1.3	0.05	N/A	1.49	392675	3796474	br	11095500	274.5	61*	11.3	43.6071	5.31867	18.2786	2.48487
Classic Canyon	CCR2b	0.12	3	2	1.625	0.3	0.05	N/A	1.49	392675	3796474	sed	11095500	274.5	61*	11.3	52.6548	6.54975	20.4443	3.27678
Fox Creek	FXR1	0.05	2	3	2.25	1	0.03	0.05	22.75	391431	3797425	br	11095500	274.5	2.4075	1.9	2.1525	1.26129	1.44056	0.541183
Fox Creek	FXR2	0.05	5	13	3.5	0.75	0.03	0.05	22.75	391467	3797391	sed	11095500	274.5	2.71477	2.6	2.42479	1.95487	2.03301	1.15838
Fox Creek	FXR3	0.05	3	3.5	3.5	1	0.03	0.05	22.75	391482	3797388	sed	11095500	274.5	5.90515	6.1	4.98416	4.42329	2.70418	2.51714
Fox Creek	FXR4	0.05	3.6	7.5	3.35	0.85	0.03	0.05	22.75	391495	3797399	sed	11095500	274.5	2.75594	2.9	2.66271	2.19421	2.20912	1.41286
Fox Creek	FXR5	0.05	4	3.5	2.75	0.7	0.03	0.05	22.75	391501	3797420	sed	11095500	274.5	3.68488	3.6	2.70132	2.49488	2.17376	1.30447
Fox Creek	FXR6	0.05	7	27	2	0.5	0.03	0.05	22.75	391565	3797461	sed	11095500	274.5	N/A‡	N/A‡	N/A‡	N/A‡	N/A‡	N/A‡
Fox Creek	FXR7	0.05	4	6	3	2	0.03	0.05	22.75	391582	3797472	?	11095500	274.5	2.67331	2.3	2.36881	1.80789	2.11332	1.18173
Fox Creek	FXR8	0.05	4	3.5	3.5	0.7	0.03	0.05	22.75	391611	3797487	sed	11095500	274.5	5.88629	6	4.67062	4.30604	2.68303	2.35242
Fox Creek	FXR9	0.05	5	16	3.5	0.5	0.03	0.05	24.6	391524	3796514	sed	11095500	274.5	2.67513	2.5	2.33254	1.86116	1.98419	1.09771
Millard Canyon	M1	0.075	5	17	2.9	0.3	0.05	N/A	5.1	394833	3787038	sed	11098000	41.4	2.45483	2.4	1.80351	1.69691	N/A‡	N/A‡
Wolfskill Canyon	W1	0.1	6	9	5	1.2	0.17	0.13	5.2	430738	3781897	sed	N/A⁑	5.4	7.85655	113.5	6.09859	80.6442	3.06454	36.4148
Dry Meadow Ck	STC1	0.05	12	2.66	6.165	3.9	0.1	N/A	93.5	366139	3984275	?	11186000	2191	111*	147.1	111*	117.568	108.983	71.9029
Dry Meadow Ck	STC2	0.05	12	3.74	4.7825	2	0.1	N/A	93.5	366143	3984266	?	11186000	2191	111*	90.9	91.023	66.5456	26.9416	32.099
Dry Meadow Ck	STC3	0.05	12	5.34	9.1625	5	0.1	N/A	93.5	366146	3984250	sed	11186000	2191	111*	170.9	111*	125.816	89.9014	66.211
Dry Meadow Ck	STC4	0.05	12	3.89	5.865	4.62	0.1	N/A	93.5	366155	3984237	sed	11186000	2191	111*	113.9	111*	84.1	44.7998	42.5997
Dry Meadow Ck	STC5	0.05	12	1.24	4.89	2.21	0.1	N/A	93.5	366159	3984225	br	11186000	2191	51.3302	50.7**	51.3302	50.7**	51.3302	50.7**
Dry Meadow Ck	STC6	0.05	12	2.85	7.375	2.53	0.1	N/A	93.5	366166	3984219	?	11186000	2191	111*	178.3	111*	141.659	111*	85.7918
Dry Meadow Ck	STC7	0.05	12	2.36	4.5	2.55	0.1	N/A	93.5	366175	3984206	sed	11186000	2191	111*	133.7**	111*	101.419	65.1117	58.8165
Dry Meadow Ck	STC8	0.05	12	11	4.375	1.35	0.1	N/A	93.5	366191	3984207	?	11186000	2191	N/A‡	N/A‡	N/A‡	N/A‡	N/A‡	N/A‡
Dry Meadow Ck	STC9	0.05	12	13.99	6.4	3.57	0.1	N/A	93.5	366246	3984191	?	11186000	2191	19.3414	23.2	11.704	14.4293	N/A‡	N/A‡
Kapaa Stream	HFU	0.007	12	6	4	3	0.15	0.62	16.8	464537	2444738	?	16060000	61.5	N/A‡	N/A‡	N/A‡	N/A‡	N/A‡	N/A‡
SF Wailua River	WF	0.006	12	49	40	10	0.1	N/A	62	460951	2436662	?	16060000	61.5	1.79793	358.1	1.52024	300.573	1.25032	213.78
Huleia Stream	KP	0.003	10	5.6	22.25	7.5	0.2	N/A	47	456876	2427414	?	16055000	46.83	15.0578	414.2**	14.3791	404.8**	10.9707	367.72
Kaulaula Valley	KA	0.13	6	39	3.65	0.2	0.3	N/A	3.2	425986	2442220	?	16130000	9.81	N/A‡	N/A‡	N/A‡	N/A‡	N/A‡	N/A‡
Hanakapiai Stream	HF	0.4	10	120	22	4.7	0.3	N/A	4.5	438743	2453474	?	16115000	7.1	21*	40100**	21*	1630.13	21*	468.454
† S - reach-averaged channel slope, W - reach-averaged channel width upstream of the waterfall, Hdrop - waterfall drop height, rpool - plunge-pool radius, D50 and D84 - estimate of median and 84 percentile grain size for the river reach, respectively. Grain size data comes from a mix of visual estimates and pebble counts, in cases where pebble counts were performed, we report both D50 and D84, fo…

## Sheet: Table_S2
Table S2: Individual clast measurements for grain size distributions shown in Figure 1*
Particle diameter (cm)
Arroyo Seco					Wolfskill Falls
Channel	Pool 1	Bar 1	Pool 2	Bar 2	Channel	Pool	Bar
48	1	8	0.1	40	20	2	10
6	1	9	0.1	22	4	0.8	8
50	0.5	48	0.3	13	24	1.8	28
17	2	85	3.2	35	1	1.5	20
46	1	3	1.5	6	2	1.5	3
0.6	1	4	4.5	0.1	3	4.5	4
222	2	1	7.5	75	20	4	25
1.7	4	20	1.2	8	2	3	21
0.3	2	45	11	1	3	0.1	15
9.3	4	44	4	13	10	2	16
1.2	2	66	5	45	3	1.5	18
2.1	6	45	10.5	0.1	0.5	1	16
1.6	2	85	0.1	0.1	2	0.1	10
0.6	1	8	2	0.1	10	0.1	20
0.6	2	35	10	90	1	0.8	25
0.8	0.6	70	21	0.1	2	20	16
2.4	2	30	2.5	0.1	1	0.9	12
0.7	0.3	6	4	40	1	1.2	12
0.9	3.5	23	0.1	2	20	0.4	26
4.1	0.8	15	2	2	23	1.1	23
4	4	30	0.8	2	2	0.5	17
30	2.5	4	13	1	3	70	26
120	1.2	3	3.5	0.1	2	1.5	22
0.6	7.5	15	0.5	2	2	0.5	14
47	2	30	5.5	4	5	0.1	19
1.6	1.2	0.1	2.5	110	4	0.1	10
1.1	1.8	20	0.1	25	2	0.1	12
1	0.5	12	1.1	17	1	0.1	6
4.2	0.3	11	5.5	35		0.1	10
42	0.5	55	3.5	45		0.1	27
3.1	0.8	0.5	2.1	0.1		8	11
1.4	0.3	3	0.1	0.1		0.1	28
1.6	3	6	0.1	45			32
0.9	2	45	2	0.1			27
2.1	0.1	28	1.5	0.1			18
43	0.6	80	0.1	0.1			7
4.9	0.3	0.5	5.5	0.1			25
8.8	4.5	0.1	5	42			10
7.6	1.2	4	6	3			13
2.1	2.5	0.5	1	70			7
2.2	6	2	0.5	42			7
3.2	2.5	50	4	10			22
2.6	1.5	30	0.5	0.1			30
0.6	2	35	0.2	65			17
0.4	2	60	1	0.1			8
1.2	0.3	2	2	3			15
0.3	0.5	4	0.1	70			30
2.7	1.2	38	0.2	8			15
0.8	1.5	22.1	2	30			11
1.1	0.2	41	0.1	90			12
2.1	0.1	2.5	5	5			17
4.5	0.1	50	1.5	55			10
5.1	2		8	5			16
4.1	0.5		5	0.1			19
3.2	1.2		1.5	50			18
0.5	0.2		4.5	0.1			15
0.9	0.2		1.5	0.1			24
0.5	1.5		7	50			18
0.5	2		2.5	0.2			13
4	0.1		2.5				12
18	1.2		7				11
52	0.1		1.5				6
0.2	2		0.1
40	1.6		0.1
80	1.2		0.1
80	0.7		0.3
4.2	4		2
1.5	2.5		2
2.2	1.5		5
0.4	1.8		3.5
1.6	2.5		4
	1.3		2.5
	1		0.5
	2		1.5
	1.5		8
	0.8		2
	1.2		1.5
	1.5		3.5
	0.1		1.5
	0.1		5
	1.2		0.7
	0.5		1.1
	0.2		2.6
	2.2		1.2
	0.3		8
	0.5		5
	1.5		1
	0.5		2.5
	0.1		1.5
	0.1		0.1
	3.3		0.2
	1.5		0.4
	0.8		1.5
	1.5		4.2
	1.2		0.1
	1		0.1
			0.1
			0.1
* All grain size measurements on Arroyo Seco and Wolfskill Falls made on 17 March 2010 and 12 March 2010, respectively . Grain size counts were conducted either by via a heel-toe random walk or stretching a measuring tape and measuring grains every 0.5 m. Arroyo Seco Pool/Bar 1 and Pool/Bar 2 are separated by less than 100 m and the channel grain size measurements was taken in the fluvial reach b…
